# Supplementary material
Source: HighWire-hosted journal article supplement (https://cmaj.ca/highwire/filestream/81128/field_highwire_adjunct_files/0/210779-res-1-at.pdf)
Supplement: 210779-res-1-at.pdf [file 210779-res-1-at.pdf]

## FNED2 Triage Manuscript - Appendices

### Appendix 1a: Conditions for Analysis

| EDC Group                 | EDC within Group                                                                                                                                                                                                                                                                                        | Condition within EDC Group                                                            | Reason This Condition was Selected for Analysis                                                                                                                                 |
|---------------------------|---------------------------------------------------------------------------------------------------------------------------------------------------------------------------------------------------------------------------------------------------------------------------------------------------------|---------------------------------------------------------------------------------------|---------------------------------------------------------------------------------------------------------------------------------------------------------------------------------|
| Trauma and Injury         | Abdominal Trauma; Amputation; Burns; Cardiothoracic Trauma; Frostbite; Head and Neck Injuries; Head and Neck Trauma; Kidney or Ureter Trauma; Lower Limb Injuries; Nerve Root and Spinal Plexus Injury; Other Fracture; Other Injuries; Spinal Cord Injury; Spinal Fractures without Spinal Cord Injury | Long bone fractures (multiple diagnoses codes, see Appendices)                        | No specific code stands out for the Injury and Trauma group. Long bone fractures have been previously examined in American research on first peoples.                           |
| Infection                 | Cellulitis, Gangrene, Infections, Kidney Infections, Otitis Media, Pneumonia, Septicemia, Tuberculosis, Upper Respiratory Infections, Urinary Tract Infections, Venereal Disease.                                                                                                                       | Acute Upper Respiratory Infections, unspecified (ICD-10 J069)                         | J069 represents 325,853 First Nations ED visits (20.3% of all First Nations infection visits based on first diagnosis code, the highest proportion of any infection code).      |
| Mental Health             | Acute Mental Health; Diagnoses; Acute Stress and Anxiety Diagnoses; Bi-Polar Disorder; Chronic Mental Health Diagnoses; Chronic Stress and Anxiety Diagnoses; Depressive and/or Other Psychoses; Eating Disorder; Schizophrenia; Suicide Attempt                                                        | Anxiety Disorder, unspecified (ICD-10 F419)                                           | F419 represents 66,102 First Nations ED visits (31.7% of all First Nations Mental Health visits based on 1st diagnosis code, the highest proportion of any mental health code). |
| Obstetrics and Gynecology | Abortion; Acute Gynecological Diagnoses; Breast Diagnoses; Cesarean Section; Chronic Gynecological Diagnoses; Infertility - Female; Obstetrical Diagnosis; Tubal/Ovarian/Ectopic Pregnancy                                                                                                              | Spontaneous Abortion (multiple ICD-10 codes selected by clinician team members)       | Recommended by AFNIGC co-lead given First Nations communities' interest in women's health.                                                                                      |
| Substance Use             | Acute Alcohol Abuse; Chronic Alcohol Abuse; Cocaine Abuse; Opioid Abuse; Other Significant; Drug Abuse; Tobacco Use Disorder                                                                                                                                                                            | Opioid Related Visits (multiple T40 and F11 codes selected by clinician team members) | Recommended by AFNIGC co-lead given First Nations communities' interest in opioid related issues.                                                                               |

Legend: EDC – Episode Disease Category

## FNED2 Triage Manuscript - Appendices

### Appendix 1b: Dataset as Analyzed, comparing First Nations and Non-First Nations by CTAS Score

|                                           | First Nations               |       |                                          |       | Non-First Nations           |       |                                          |       |
|-------------------------------------------|-----------------------------|-------|------------------------------------------|-------|-----------------------------|-------|------------------------------------------|-------|
|                                           | Higher Acuity<br>(CTAS 1-2) |       | Lower Acuity<br>(CTAS 3-5 or<br>Missing) |       | Higher Acuity<br>(CTAS 1-2) |       | Lower Acuity<br>(CTAS 3-5 or<br>Missing) |       |
| <b>Age Mean, SD</b>                       | 33.72                       | 19.9  | 31                                       | 20.4  | 43.5                        | 24.96 | 37.8                                     | 24.4  |
| <b>Sex, n %</b>                           |                             |       |                                          |       |                             |       |                                          |       |
| Female or other                           | 42625                       | 7.4%  | 533548                                   | 92.6% | 587315                      | 11.3% | 4630946                                  | 88.7% |
| Male                                      | 40871                       | 8.5%  | 437999                                   | 91.5% | 610844                      | 12.4% | 4332090                                  | 87.6% |
| <b>Comorbidities, n %</b>                 |                             |       |                                          |       |                             |       |                                          |       |
| None                                      | 32875                       | 9.7%  | 306949                                   | 90.3% | 714223                      | 9.9%  | 6521517                                  | 90.1% |
| 1 or more                                 | 50621                       | 7.1%  | 664598                                   | 92.9% | 483936                      | 16.5% | 2441519                                  | 83.5% |
| <b>Area Income, n %</b>                   |                             |       |                                          |       |                             |       |                                          |       |
| <\$42,000                                 | 37558                       | 8.4%  | 408271                                   | 91.6% | 254549                      | 13.1% | 1693526                                  | 86.9% |
| ≥\$42,000                                 | 45938                       | 7.5%  | 563276                                   | 92.5% | 943610                      | 11.5% | 7269510                                  | 88.5% |
| <b>AHS Zone of Patient Residence, n %</b> |                             |       |                                          |       |                             |       |                                          |       |
| South Zone                                | 4374                        | 4.0%  | 103823                                   | 96.0% | 45877                       | 5.3%  | 815422                                   | 94.7% |
| Calgary Zone                              | 25592                       | 19.7% | 104399                                   | 80.3% | 601384                      | 19.7% | 2455570                                  | 80.3% |
| Central Zone                              | 9235                        | 5.9%  | 147158                                   | 94.1% | 95052                       | 5.8%  | 1536609                                  | 94.2% |
| Edmonton Zone                             | 23389                       | 14.7% | 135739                                   | 85.3% | 342848                      | 14.2% | 2076190                                  | 85.8% |
| North Zone                                | 20906                       | 4.2%  | 480428                                   | 95.8% | 112998                      | 5.2%  | 2079245                                  | 94.8% |
| <b>Travel Distance, n %</b>               |                             |       |                                          |       |                             |       |                                          |       |
| ≤5k                                       | 35010                       | 7.6%  | 427451                                   | 92.4% | 547731                      | 9.9%  | 4961706                                  | 90.1% |
| >5k                                       | 48486                       | 8.2%  | 544096                                   | 91.8% | 650428                      | 14.0% | 4001330                                  | 86.0% |

## FNED2 Triage Manuscript - Appendices

### Appendix 1b: Dataset as Analyzed, comparing First Nations and Non-First Nations by CTAS Score (Continued)

|                                            | First Nations            |                                    |                          |                                    | Non-First Nations        |                                    |                          |                                    |
|--------------------------------------------|--------------------------|------------------------------------|--------------------------|------------------------------------|--------------------------|------------------------------------|--------------------------|------------------------------------|
|                                            | Higher Acuity (CTAS 1-2) | Lower Acuity (CTAS 3-5 or Missing) | Higher Acuity (CTAS 1-2) | Lower Acuity (CTAS 3-5 or Missing) | Higher Acuity (CTAS 1-2) | Lower Acuity (CTAS 3-5 or Missing) | Higher Acuity (CTAS 1-2) | Lower Acuity (CTAS 3-5 or Missing) |
| <b>Ambulance Arrival, n %</b>              |                          |                                    |                          |                                    |                          |                                    |                          |                                    |
| Yes (air, ground or combination)           | 37100                    | 23.4%                              | 121144                   | 76.6%                              | 337484                   | 33.3%                              | 675232                   | 66.7%                              |
| No                                         | 46396                    | 5.2%                               | 850403                   | 94.8%                              | 860675                   | 9.4%                               | 8287804                  | 90.6%                              |
| <b>Shift, n %</b>                          |                          |                                    |                          |                                    |                          |                                    |                          |                                    |
| 00:01-08:00                                | 18083                    | 14.9%                              | 103029                   | 85.1%                              | 196049                   | 16.6%                              | 981588                   | 83.4%                              |
| 8:01-16:00                                 | 28784                    | 6.1%                               | 443789                   | 93.9%                              | 507879                   | 9.9%                               | 4607498                  | 90.1%                              |
| 16:01-00:00                                | 36629                    | 7.9%                               | 424729                   | 92.1%                              | 494231                   | 12.8%                              | 3373950                  | 87.2%                              |
| <b>Facility type, n %</b>                  |                          |                                    |                          |                                    |                          |                                    |                          |                                    |
| Community Ambulatory or Urgent Care Centre | 4756                     | 6.9%                               | 64472                    | 93.1%                              | 111525                   | 7.9%                               | 1299412                  | 92.1%                              |
| Tertiary Pediatric                         | 6446                     | 22.4%                              | 22391                    | 77.6%                              | 92512                    | 16.2%                              | 477331                   | 83.8%                              |
| Tertiary Mixed                             | 20941                    | 26.6%                              | 57809                    | 73.4%                              | 283593                   | 29.6%                              | 674154                   | 70.4%                              |
| Regional Hospital                          | 27777                    | 15.9%                              | 146940                   | 84.1%                              | 546761                   | 18.2%                              | 2463880                  | 81.8%                              |
| Large Community Hospital                   | 7984                     | 3.6%                               | 213431                   | 96.4%                              | 63261                    | 4.6%                               | 1321662                  | 95.4%                              |
| Medium Community Hospital                  | 13392                    | 3.8%                               | 338331                   | 96.2%                              | 63261                    | 3.1%                               | 1972939                  | 96.9%                              |
| Small Community Hospital                   | 2200                     | 1.7%                               | 128173                   | 98.3%                              | 21980                    | 2.8%                               | 753658                   | 97.2%                              |
| <b>Disposition, n %</b>                    |                          |                                    |                          |                                    |                          |                                    |                          |                                    |
| Admitted                                   | 19939                    | 30.9%                              | 44567                    | 69.1%                              | 293648                   | 36.6%                              | 508625                   | 63.4%                              |
| Deceased in ED                             | 365                      | 84.9%                              | 65                       | 15.1%                              | 5458                     | 86.5%                              | 853                      | 13.5%                              |
| Discharged                                 | 53985                    | 6.0%                               | 848152                   | 94.0%                              | 808278                   | 9.2%                               | 7995988                  | 90.8%                              |
| Left against medical advice                | 1642                     | 6.7%                               | 22815                    | 93.3%                              | 9251                     | 10.1%                              | 82737                    | 89.9%                              |
| Left without being seen                    | 1600                     | 3.6%                               | 42559                    | 96.4%                              | 14652                    | 5.4%                               | 259155                   | 94.6%                              |
| Transferred                                | 5965                     | 30.8%                              | 13389                    | 69.2%                              | 66872                    | 36.6%                              | 115678                   | 63.4%                              |
| <b>Totals</b>                              | <b>83496</b>             | <b>7.9%</b>                        | <b>971547</b>            | <b>92.1%</b>                       | <b>1198159</b>           | <b>11.8%</b>                       | <b>8963036</b>           | <b>88.2%</b>                       |

## FNED2 Triage Manuscript - Appendices

Legend: CTAS – Canadian Triage Acuity Score

### Appendix 1c: Complete Data Set (prior to listwise deletion) Showing Missing Data

|                               | First Nations               |       |                            |        |                |       | Non-First Nations           |       |                            |       |                |       |
|-------------------------------|-----------------------------|-------|----------------------------|--------|----------------|-------|-----------------------------|-------|----------------------------|-------|----------------|-------|
|                               | Higher Acuity<br>(CTAS 1-2) |       | Lower Acuity<br>(CTAS 3-5) |        | Missing Triage |       | Higher Acuity<br>(CTAS 1-2) |       | Lower Acuity<br>(CTAS 3-5) |       | Missing Triage |       |
| <b>Age Mean, SD</b>           | 33.9                        | 19.4  | 31.1                       | 20.2   | 32.7           | 21.3  | 43.5                        | 24.8  | 37.6                       | 24.2  | 42             | 24.8  |
| Missing n, %                  | 3                           |       | 3                          |        | 0              |       | 15                          |       | 19                         |       | 1              |       |
| <b>Age Group</b>              |                             |       |                            |        |                |       |                             |       |                            |       |                |       |
| Age <18                       | 17742                       | 6.1%  | 258923                     | 89.1%  | 13822          | 4.8%  | 207104                      | 8.9%  | 2054703                    | 88.3% | 65866          | 2.8%  |
| Age 18-54                     | 59899                       | 9.1%  | 565413                     | 86.3%  | 30195          | 4.6%  | 600174                      | 11.2% | 4571850                    | 85.7% | 163287         | 3.1%  |
| Age 55+                       | 13795                       | 9.0%  | 130486                     | 85.0%  | 9143           | 6.0%  | 446665                      | 15.3% | 2358941                    | 80.7% | 118238         | 4.0%  |
| missing                       | 3                           |       | 3                          |        | 0              |       | 15                          |       | 19                         |       | 1              |       |
| <b>Sex, n %</b>               |                             |       |                            |        |                |       |                             |       |                            |       |                |       |
| Female                        | 45893                       | 7.7%  | 520923                     | 87.4%  | 29432          | 4.9%  | 607406                      | 11.3% | 4597684                    | 85.4% | 179143         | 3.3%  |
| Male                          | 45546                       | 9.1%  | 433899                     | 86.2%  | 23728          | 4.7%  | 646547                      | 12.4% | 4387810                    | 84.3% | 168249         | 3.2%  |
| Missing                       | 0                           | 0.0%  | 3                          | 100.0% | 0              | 0.0%  | 5                           | 20.8% | 19                         | 79.2% | 0              | 0.0%  |
| <b>Comorbidities, Mean SD</b> | 0.9                         | 1.8   | 0.6                        | 1.4    | 0.7            | 1.50  | 0.9                         | 1.8   | 0.5                        | 1.3   | 0.7            | 1.6   |
| <b>Area Income, Mean SD</b>   | 36708                       | 18509 | 35597                      | 17442  | 33739          | 15365 | 49678                       | 23583 | 47830                      | 20361 | 42992          | 13724 |
| missing                       | 7475                        | 20.7% | 28402                      | 78%    | 306            | 1%    | 54258                       | 13%   | 348973                     | 84%   | 9959           | 2%    |

## **FNED2 Triage Manuscript - Appendices**

**FNED2 Triage Manuscript - Appendices**

**Appendix 1c: Complete Data Set (prior to listwise deletion) Showing Missing Data (Continued)**

|                                      | First Nations               |       |                            |       |                |       | Non-First Nations           |       |                            |       |                |      |
|--------------------------------------|-----------------------------|-------|----------------------------|-------|----------------|-------|-----------------------------|-------|----------------------------|-------|----------------|------|
|                                      | Higher Acuity<br>(CTAS 1-2) |       | Lower Acuity<br>(CTAS 3-5) |       | Missing Triage |       | Higher Acuity<br>(CTAS 1-2) |       | Lower Acuity<br>(CTAS 3-5) |       | Missing Triage |      |
| <b>AHS Zone of Patient Residence</b> |                             |       |                            |       |                |       |                             |       |                            |       |                |      |
| South Zone                           | 4378                        | 4.0%  | 92183                      | 85.1% | 11716          | 10.8% | 45989                       | 5.3%  | 744077                     | 86.3% | 72349          | 8.4% |
| Calgary Zone                         | 29657                       | 20.7% | 111962                     | 78.1% | 1758           | 1.2%  | 614485                      | 19.8% | 2462453                    | 79.3% | 29652          | 1.0% |
| Central Zone                         | 9308                        | 5.9%  | 140977                     | 89.8% | 6639           | 4.2%  | 95916                       | 5.9%  | 1461799                    | 89.2% | 81424          | 5.0% |
| Edmonton Zone                        | 26153                       | 15.0% | 147266                     | 84.4% | 1096           | 0.6%  | 349983                      | 14.3% | 2088529                    | 85.0% | 17300          | 0.7% |
| North Zone                           | 21444                       | 4.2%  | 456842                     | 89.6% | 31704          | 6.2%  | 113392                      | 5.2%  | 1945289                    | 88.6% | 137073         | 6.2% |
| missing                              | 499                         |       | 5595                       |       | 247            |       | 34193                       |       | 283366                     |       | 9594           |      |
| <b>Travel Distance, Mean SD</b>      | 16.7                        | 29.8  | 19.2                       | 32.3  | 20.9           | 32.6  | 7.1                         | 8.7   | 7.6                        | 11.2  | 8.3            | 14.6 |
| missing                              | 7943                        | 17.9% | 35760                      | 80.6% | 675            | 1.5%  | 55791                       | 13.1% | 359650                     | 84.5% | 10187          | 2.4% |
| <b>Ambulance Arrival, n %</b>        |                             |       |                            |       |                |       |                             |       |                            |       |                |      |
| <b>Any</b>                           | 41876                       | 24.1% | 126460                     | 72.9% | 5128           | 3.0%  | 358257                      | 33.6% | 694604                     | 65.1% | 13423          | 1.3% |
| <b>No</b>                            | 49563                       | 5.4%  | 828365                     | 89.5% | 48032          | 5.2%  | 895701                      | 9.4%  | 8290909                    | 87.1% | 333969         | 3.5% |
| <b>Shift, n %</b>                    |                             |       |                            |       |                |       |                             |       |                            |       |                |      |
| 00:01-08:00                          | 20140                       | 15.4% | 106822                     | 81.4% | 4195           | 3.2%  | 207183                      | 16.7% | 1001327                    | 80.9% | 28462          | 2.3% |
| 8:01-16:00                           | 31197                       | 6.4%  | 431304                     | 88.2% | 26235          | 5.4%  | 529362                      | 9.9%  | 4597015                    | 86.4% | 194439         | 3.7% |
| 16:01-00:00                          | 40102                       | 8.4%  | 416699                     | 86.9% | 22730          | 4.7%  | 517413                      | 12.8% | 3387171                    | 84.1% | 124491         | 3.1% |

**FNED2 Triage Manuscript - Appendices**

**Appendix 1c: Complete Data Set (prior to listwise deletion) Showing Missing Data (Continued)**

|                                            | First Nations            |       |                         |       |                |       | Non-First Nations        |       |                         |       |                |      |
|--------------------------------------------|--------------------------|-------|-------------------------|-------|----------------|-------|--------------------------|-------|-------------------------|-------|----------------|------|
|                                            | Higher Acuity (CTAS 1-2) |       | Lower Acuity (CTAS 3-5) |       | Missing Triage |       | Higher Acuity (CTAS 1-2) |       | Lower Acuity (CTAS 3-5) |       | Missing Triage |      |
| <b>Facility type, n %</b>                  |                          |       |                         |       |                |       |                          |       |                         |       |                |      |
| Community Ambulatory or Urgent Care Centre | 5533                     | 7.2%  | 68024                   | 89.0% | 2844           | 3.7%  | 116501                   | 8.0%  | 1312528                 | 89.8% | 32522          | 2.2% |
| Tertiary Pediatric                         | 6615                     | 22.5% | 22762                   | 77.5% | 2              | 0.0%  | 94360                    | 16.3% | 484577                  | 83.7% | 44             | 0.0% |
| Tertiary Mixed                             | 24666                    | 26.0% | 70156                   | 74.0% | 20             | 0.0%  | 300988                   | 29.5% | 717853                  | 70.4% | 372            | 0.0% |
| Regional Hospital                          | 30550                    | 16.7% | 152256                  | 83.2% | 249            | 0.1%  | 570992                   | 18.1% | 2578994                 | 81.8% | 2491           | 0.1% |
| Large Community Hospital                   | 13590                    | 3.8%  | 317725                  | 89.0% | 25832          | 7.2%  | 82106                    | 3.9%  | 1894877                 | 88.9% | 155618         | 7.3% |
| Medium Community Hospital                  | 8263                     | 3.6%  | 202479                  | 89.2% | 16155          | 7.1%  | 66120                    | 4.6%  | 1264569                 | 88.0% | 106760         | 7.4% |
| Small Community Hospital                   | 2222                     | 1.7%  | 121423                  | 92.2% | 8058           | 6.1%  | 22891                    | 2.8%  | 732115                  | 91.0% | 49585          | 6.2% |
| <b>Disposition</b>                         |                          |       |                         |       |                |       |                          |       |                         |       |                |      |
| Admitted                                   | 21701                    | 30.9% | 45758                   | 65.1% | 2836           | 4.0%  | 307374                   | 36.9% | 508494                  | 61.0% | 17741          | 2.1% |
| Deceased in ED                             | 389                      | 85.3% | 27                      | 5.9%  | 40             | 8.8%  | 5729                     | 86.7% | 556                     | 8.4%  | 324            | 4.9% |
| Discharged                                 | 59270                    | 6.3%  | 834012                  | 89.3% | 40912          | 4.4%  | 844608                   | 9.2%  | 8021048                 | 87.5% | 301464         | 3.3% |
| Left against medical advice                | 1843                     | 7.2%  | 22297                   | 87.3% | 1400           | 5.5%  | 10130                    | 10.3% | 82917                   | 84.7% | 4830           | 4.9% |
| Left without being seen                    | 1931                     | 4.0%  | 39849                   | 81.8% | 6910           | 14.2% | 15637                    | 5.4%  | 257427                  | 88.6% | 17404          | 6.0% |
| Transferred                                | 6305                     | 31.1% | 12882                   | 63.6% | 1062           | 5.2%  | 70480                    | 36.9% | 115071                  | 60.2% | 5629           | 2.9% |
| <b>Sample Total</b>                        | 91439                    | 8.3%  | 954825                  | 86.8% | 53160          | 4.8%  | 1253958                  | 11.8% | 8985513                 | 84.9% | 347392         | 3.3% |

Legend: CTAS – Canadian Triage Acuity Score

## FNED2 Triage Manuscript - Appendices

### Appendix 1d: EDC Groups & Conditions of Interest by CTAS

|                                          | First Nations            |       |            |       | Non-First Nations        |       |            |       |
|------------------------------------------|--------------------------|-------|------------|-------|--------------------------|-------|------------|-------|
|                                          | Higher acuity (CTAS 1-2) |       | Other CTAS |       | Higher acuity (CTAS 1-2) |       | Other CTAS |       |
|                                          | n                        | %     | n          | %     | n                        | %     | n          | %     |
| <b>EDC Group</b>                         |                          |       |            |       |                          |       |            |       |
| Trauma and Injury                        | 12675                    | 7.4%  | 159682     | 92.6% | 133945                   | 7.0%  | 1784434    | 93.0% |
| Infection                                | 8155                     | 4.3%  | 181037     | 95.7% | 115495                   | 7.5%  | 1428463    | 92.5% |
| Breast, Obstetrics & Gynecology          | 1956                     | 5.7%  | 32112      | 94.3% | 25151                    | 9.0%  | 254007     | 91.0% |
| Mental Health                            | 5195                     | 17.9% | 23795      | 82.1% | 55587                    | 24.6% | 170685     | 75.4  |
| Substance Use                            | 7763                     | 21.6% | 28114      | 78.4% | 25936                    | 31.2% | 57130      | 68.8% |
| <b>Conditions</b>                        |                          |       |            |       |                          |       |            |       |
| Long Bone Fracture, unspecified          | 1030                     | 8.5%  | 11099      | 91.5% | 13446                    | 8.8%  | 139598     | 91.2% |
| Acute Respiratory Infection, Unspecified | 828                      | 2.1%  | 37943      | 97.9% | 10525                    | 3.9%  | 257608     | 96.1% |
| Spontaneous Abortion                     | 594                      | 9.4%  | 5723       | 90.6% | 7431                     | 11.3% | 58198      | 88.7% |
| Anxiety Disorder, Unspecified            | 458                      | 4.9%  | 8852       | 95.1% | 5590                     | 10.8% | 46192      | 89.2% |
| Opioid Related Visit                     | 1043                     | 42.9% | 1386       | 57.1% | 5196                     | 43.6% | 6734       | 56.4% |

Legend: EDC – Episode Disease Category. CTAS – Canadian Triage Acuity Score.



## FNED2 Triage Manuscript - Appendices

### Appendix 1e: Model Effects of Variables on Triage Acuity Scores for all Emergency Care Visits for Trauma and Injury

|                                                                    | OR   | 95%LCL | 95%UCL |
|--------------------------------------------------------------------|------|--------|--------|
| First Nations status v. Non-First Nations                          | 0.91 | 0.89   | 0.93   |
| Male sex v. female or other sex                                    | 1.36 | 1.34   | 1.38   |
| Age per 10 year increment                                          | 0.96 | 0.95   | 0.96   |
| Comorbidities (1 or more vs. 0)                                    | 0.97 | 0.95   | 0.99   |
| Area Income (<42,000 v. other)                                     | 1.04 | 1.02   | 1.06   |
| Trip Distance >5km v. ≤5km                                         | 1.05 | 1.04   | 1.06   |
| Arrival by ambulance (air or ground vs. not arriving by ambulance) | 6.14 | 6.05   | 6.22   |
| Evening Presentation (16:01-00:00) v. Day                          | 1.19 | 1.17   | 1.20   |
| Night Presentation (00:01-8:00) v. Day                             | 1.26 | 1.24   | 1.28   |
| <b>Facility Type (compared to Large Community Hospital)</b>        |      |        |        |
| Urgent Care Centre or Ambulatory Care Centre vs. Large             | 1.08 | 1.05   | 1.11   |
| Pediatric Tertiary Hospital                                        | 1.67 | 1.62   | 1.72   |
| Mixed Tertiary Hospital                                            | 4.08 | 3.98   | 4.18   |
| Regional Hospital                                                  | 2.20 | 2.15   | 2.24   |
| Medium Community Hospital                                          | 1.04 | 1.01   | 1.07   |
| Small Community Hospital                                           | 0.71 | 0.68   | 0.74   |
| <b>Zone of Patient Residence (Compared to Calgary)</b>             |      |        |        |
| North                                                              | 0.57 | 0.56   | 0.59   |
| Edmonton                                                           | 0.44 | 0.43   | 0.44   |
| Central                                                            | 0.58 | 0.57   | 0.59   |
| South                                                              | 0.32 | 0.31   | 0.32   |

Legend: OR – Odds Ratio. LCL – Lower Confidence Interval. UCL – Upper Confidence Interval.
